# Supplementary material
Source: Springer Nature journal article supplement (https://www.springermedizin.de/resource/supplementary/12894_2014_335_MOESM2_ESM.pdf/9513514)

**(a)**

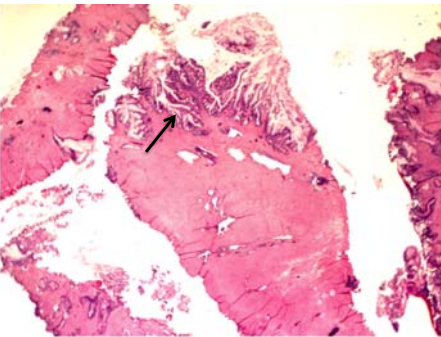

**(b)**

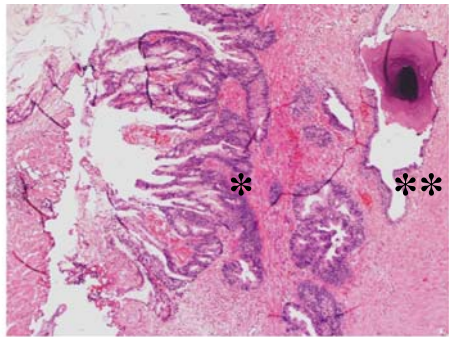

**(c)**

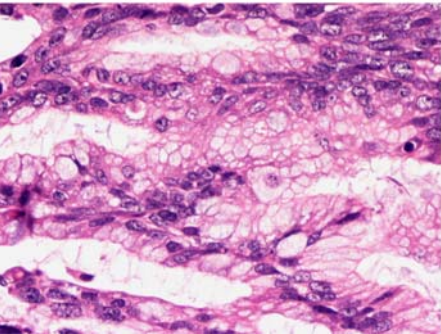

**(d)**

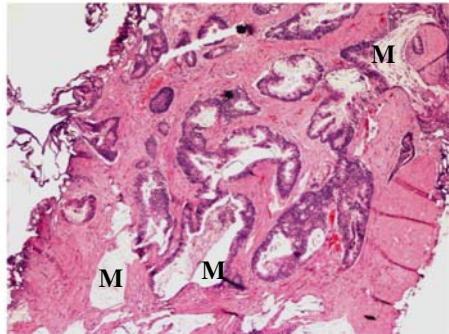

Supplement: MOESM2 [file 9513514]
